# Supplementary material for: Overexpression of RICE FLOWERING LOCUS T 1 (RFT1) Induces Extremely Early Flowering in Rice
Source: PubMed Central journal article supplement — Mol Cells. 2019 Apr 16;42(5):406–17. doi: 10.14348/molcells.2019.0009 (PMC6537653; doi:10.14348/molcells.2019.0009), 2019-04-16
Supplement: molce-42-406_Suppl.pdf [file molce-42-406_Suppl.pdf]

Supplementary Table S1. List of primers used in this study

**Primers for transgenic plants**

| Primer name    | Sequence (5'-3')              |
|----------------|-------------------------------|
| RFT1_F_HindIII | CGCAAGCTTATGGCCGGCAGCGGCAGGGA |
| RFT1_R_SpeI    | GCACTAGTCTAGGGGTAGACCCTCCTGC  |

**Primers for qRT-PCR**

|            |                            |
|------------|----------------------------|
| Ubi1_F     | CACGGTTCAACAACATCCAG       |
| Ubi1_R     | TGAAGACCCTGACTGGGAAG       |
| Hd3a_F     | AGCCCAAGTGACCCTAACCT       |
| Hd3a_R     | GTTGTAGAGCTCGGCGAAGT       |
| RFT1_F     | TTCTGGTACCACTGGAGCA        |
| RFT1_R     | GTCTCAGCTTAGCTATAGCT       |
| OsMADS1_F  | ATCACCATCAGGGTCTTCTC       |
| OsMADS1_R  | CAACCATGTCTGCTGCTTCA       |
| OsMADS2_F  | GAACACGAGAACAAGCTGCT       |
| OsMADS2_R  | TTCAATCCAGTGGTGGATCA       |
| OsMADS3_F  | CAGCGTGATCAACCTGAAGA       |
| OsMADS3_R  | CAACACACACAATATGGCAC       |
| OsMADS4_F  | CAATCTGCGGGACAAGATG        |
| OsMADS4_R  | GAGCTCCAGCTCCCTTATGC       |
| OsMADS5_F  | GCTTCATATATCTTGCCAAG       |
| OsMADS5_R  | TTGGTTGAGGTGATCCATGT       |
| OsMADS7_F  | TGGGTTCTTCCATCCACTTG       |
| OsMADS7_R  | CGTCATCATCATGGTAGCCA       |
| OsMADS8_F  | CACCTTGCAGATCGGGTTTA       |
| OsMADS8_R  | ATCTGTGTCGTCACATCCGT       |
| OsMADS14_F | TGAGCGCTACTCCTATGCAG       |
| OsMADS14_R | GCCTTCAGTTTCCTATATTCGTG    |
| OsMADS15_F | TGAGTCCATTTCCGAGCTG        |
| OsMADS15_R | TCTTCTGCCTCTCCACCAGT       |
| OsMADS18_F | ATAACAGTCAAAGCCAACCA       |
| OsMADS18_R | CAATATCGCTGGAAGATGGA       |
| OsMADS34_F | AGCAGCTCCACTGGCTACAAATGA   |
| OsMADS34_R | AGGTCGCAGAGTTCATCAAG       |
| OsMADS50_F | AAAGCTGACGCTGATGGTTTG      |
| OsMADS50_R | TTTACCGAGATCCAGCTTATTCCTGG |
| OsFD1_F    | TTCAGGTGGACGACCTTAGC       |
| OsFD1_R    | GCTAGCAGCTGCCAACACT        |
| OsFD2_F    | AGGTCGACCAAAAACAAGC        |
| OsFD2_R    | TCCTCTCATGCCTGAC           |
| OsFD3_F    | CAGAGTTCCCACCGAAGAAG       |
| OsFD3_R    | AATAATGGTCCCCAATCCAA       |
| RFL_F      | GTTGTCCGAGGAGCATGAC        |
| RFL_R      | CCTCGCCGGGCTCCGTCACC       |
